# Supplementary material for: Oleyl Conjugated Histidine-Arginine Cell-Penetrating Peptides as Promising Agents for siRNA Delivery
Source: MDPI journal article supplement (doi:10.3390/pharmaceutics14040881), 2022-04-18
Supplement: s1 [file s1]

# Supplementary Materials: Oleyl Conjugated Histidine-Arginine Cell-Penetrating Peptides as Promising Agents for siRNA Delivery

Muhammad Imran Sajid, Dindyal Mandal, Nagla Salem El-Sayed, Sandeep Lohan, Jonathan Moreno, and Rakesh Kumar Tiwari

## Contents

- |                                                        |              |
|--------------------------------------------------------|--------------|
| 1. Analytical HPLC chromatogram of conjugated peptides | Pages 2 - 5  |
| 2. MALDI-TOF mass spectrum of conjugated peptides      | Pages 6 - 11 |

## 1. Analytical HPLC chromatogram of conjugated peptides

**HPLC Method:** The purity of the peptides was determined using reverse phase analytical HPLC method at a flow rate 0.5 mL/min on Shimadzu (LC-20ADXR) with a gradient system of water with 0.1% TFA (solvent A) and mixture of acetonitrile and isopropyl alcohol (8:2) with 0.1% TFA (solvent B), using (Phenomenex Luna, 4  $\mu$ m C18 150  $\times$  4.6 mm HPLC Column).

| Time  | % Solvent B |
|-------|-------------|
| 0.01  | 5           |
| 5.0   | 5           |
| 10.0  | 12          |
| 25.0  | 60          |
| 27.0  | 95          |
| 32.0  | 95          |
| 32.01 | 5           |
| 38.0  | 5           |

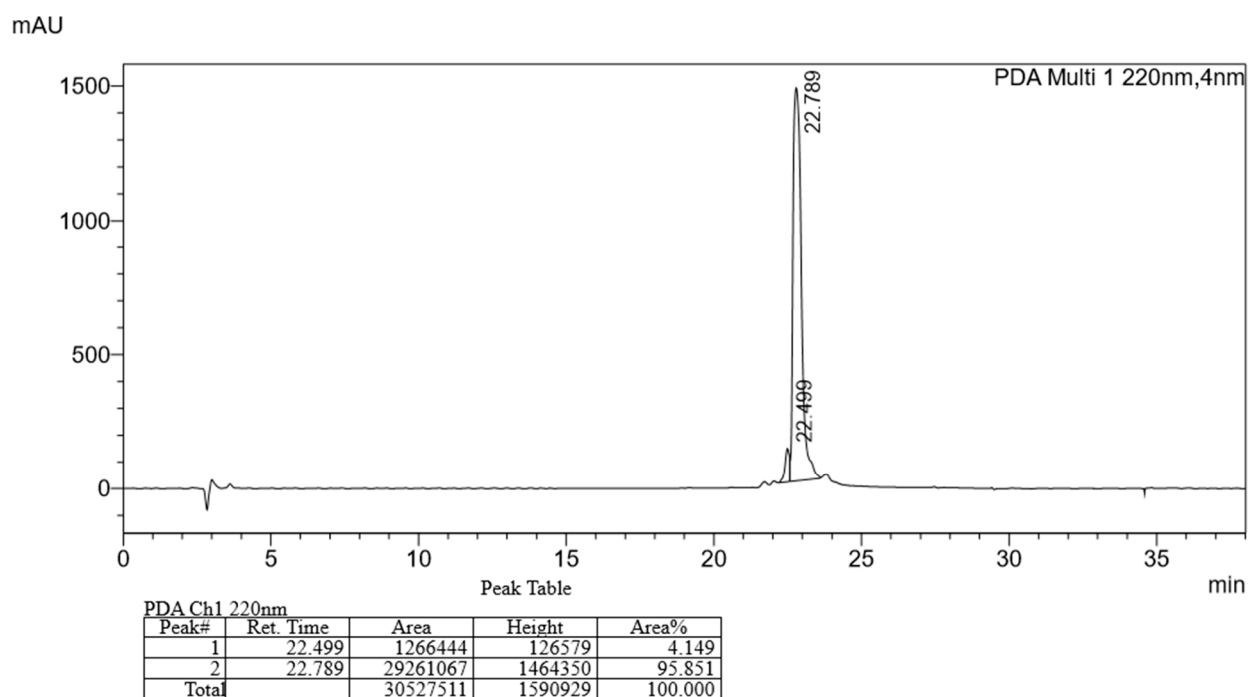

**Figure S1.** HPLC chromatogram of Oleyl-(HR)<sub>4</sub>.

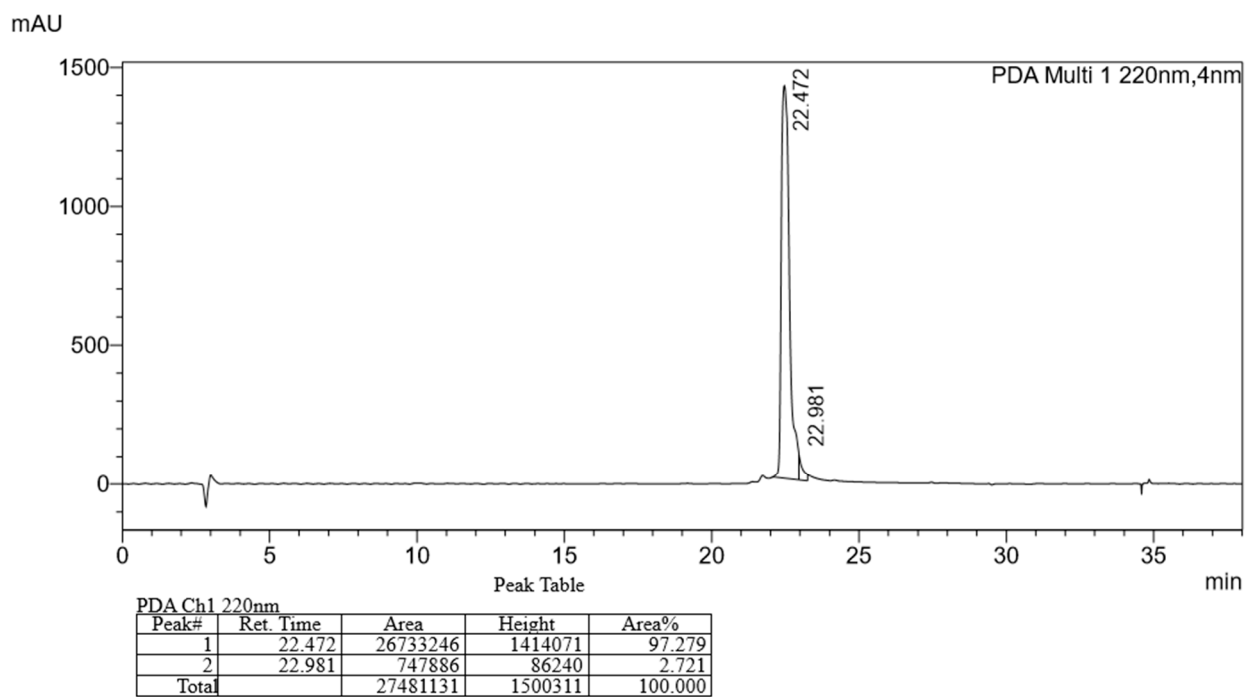

**Figure S2.** HPLC chromatogram of Oleyl-R<sub>1</sub>-(HR)<sub>4</sub>.

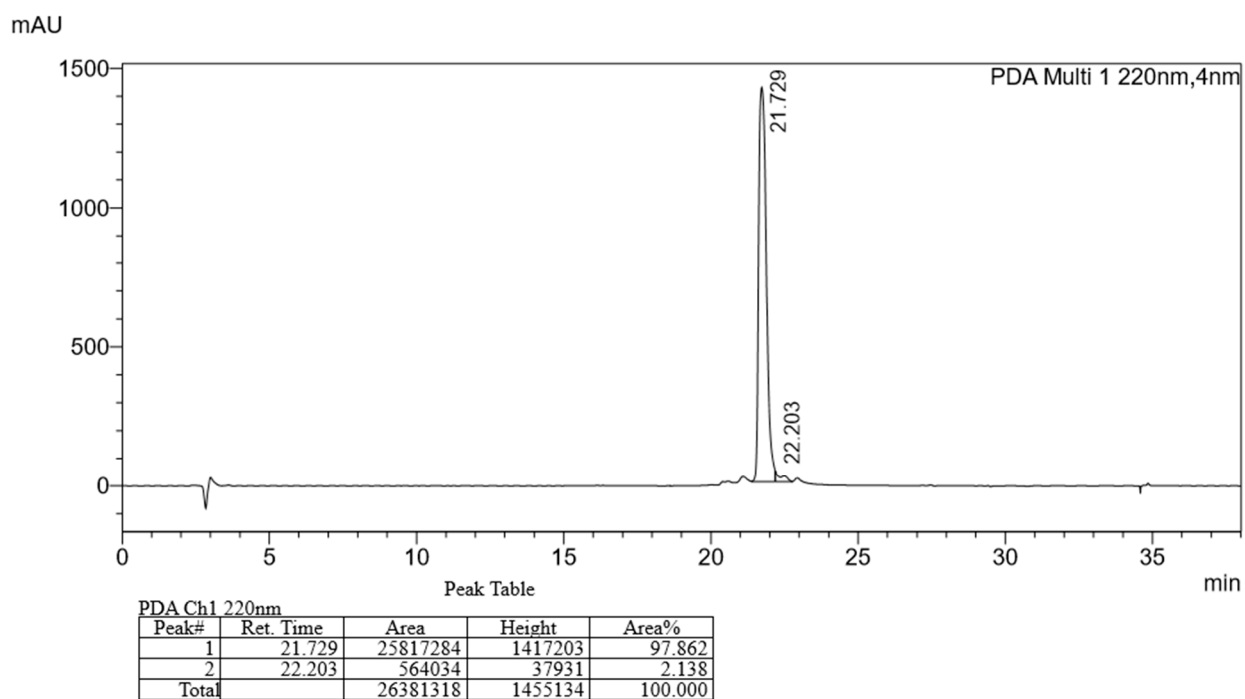

**Figure S3.** HPLC chromatogram of Oleyl-R<sub>2</sub>-(HR)<sub>4</sub>.

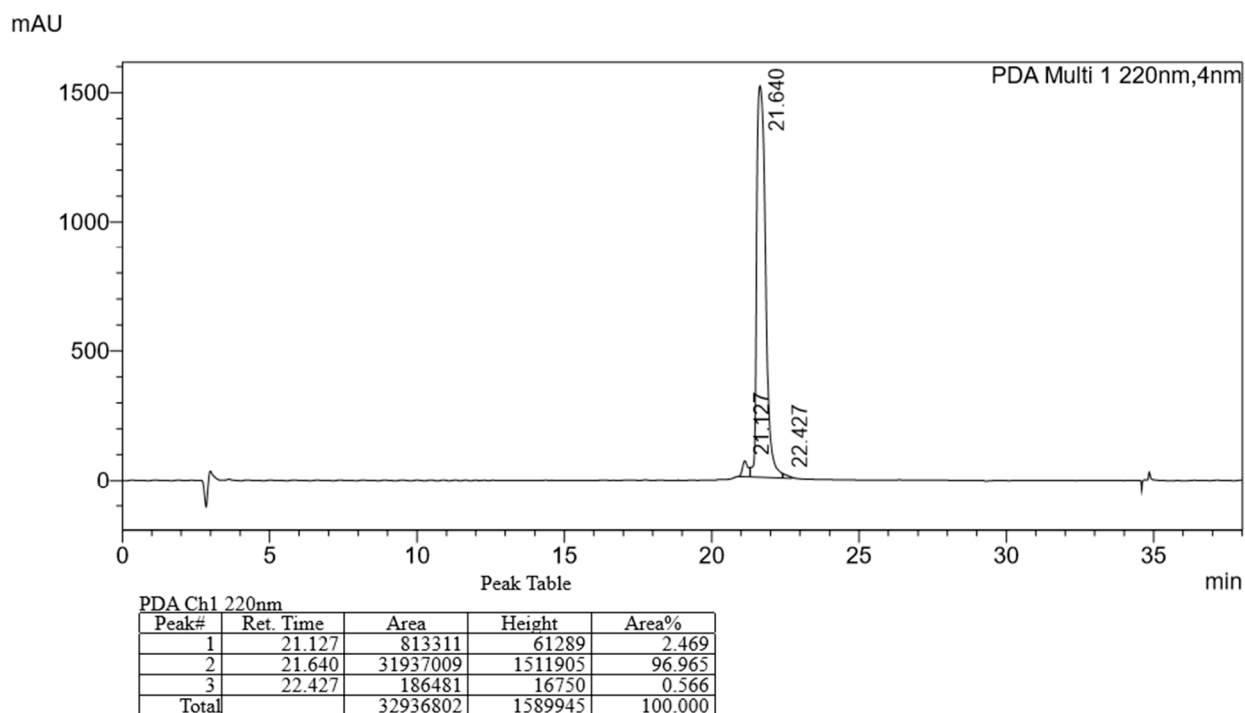

**Figure S4.** HPLC chromatogram of Oleyl-R<sub>3</sub>-(HR)<sub>4</sub>.

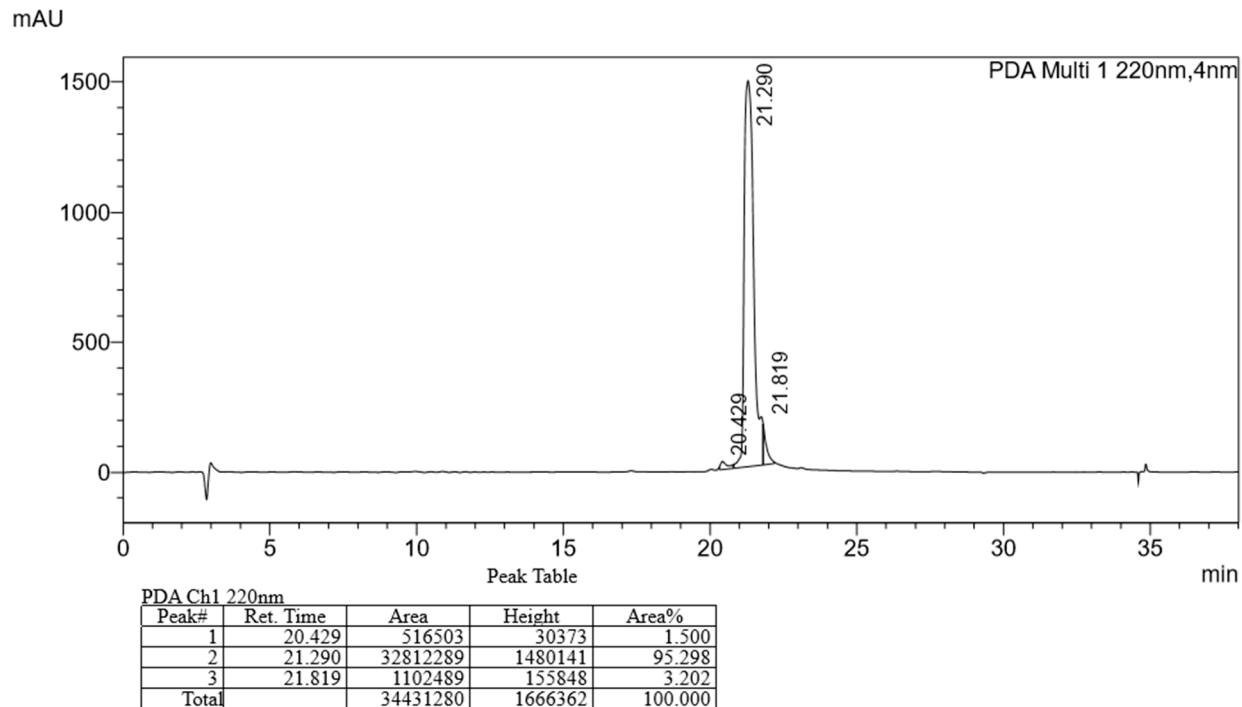

**Figure S5.** HPLC chromatogram of Oleyl-R<sub>4</sub>-(HR)<sub>4</sub>.

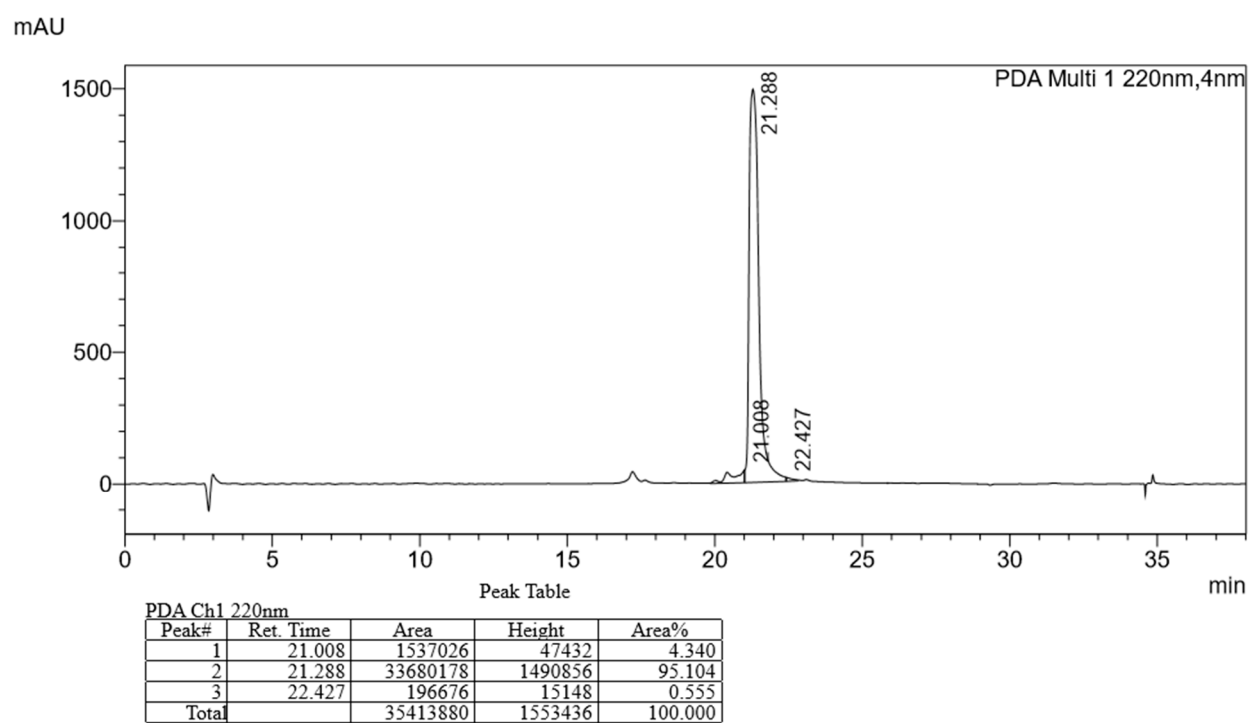

**Figure S6.** HPLC chromatogram of Oleyl-R<sub>5</sub>-(HR)<sub>4</sub>.

## 2. MALDI-TOF mass spectrum of conjugated peptides

3.

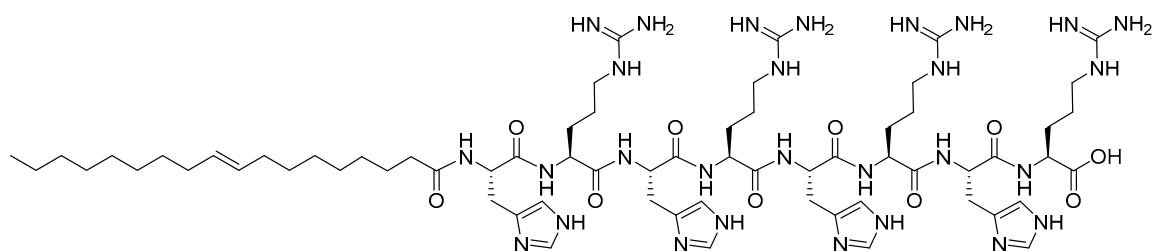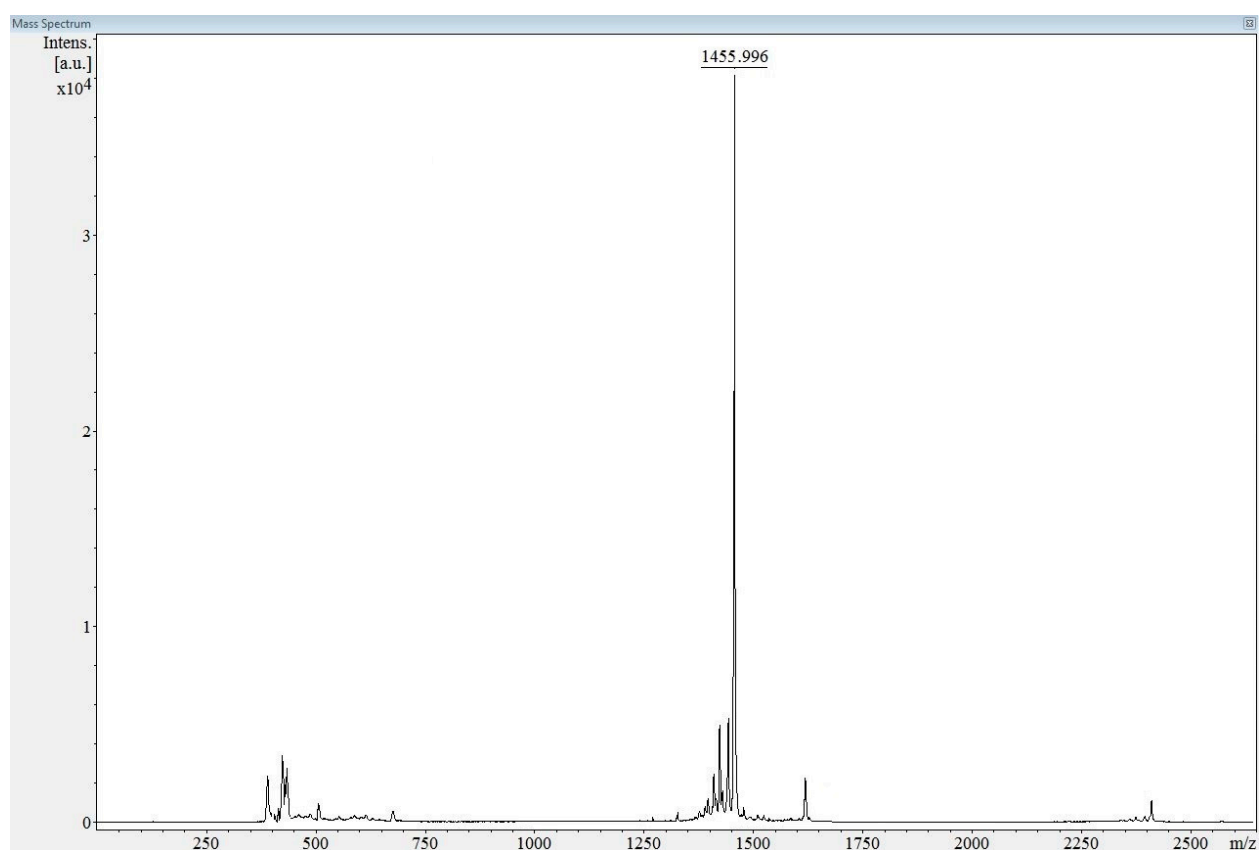

**Figure S7.** MALDI-TOF mass spectrum of Oleyl-(HR)<sub>4</sub>.

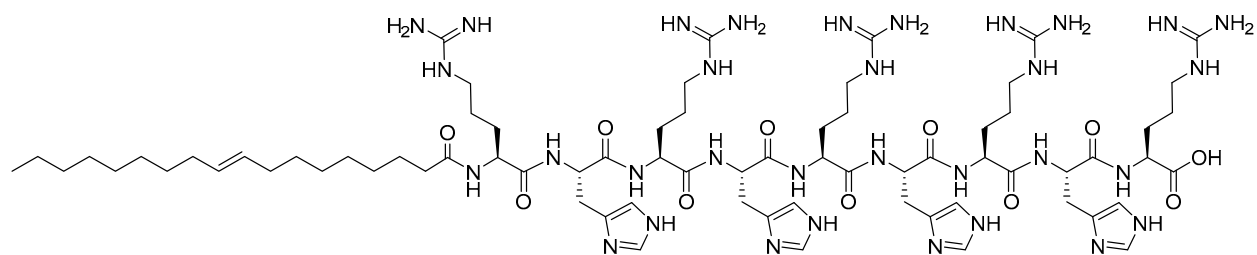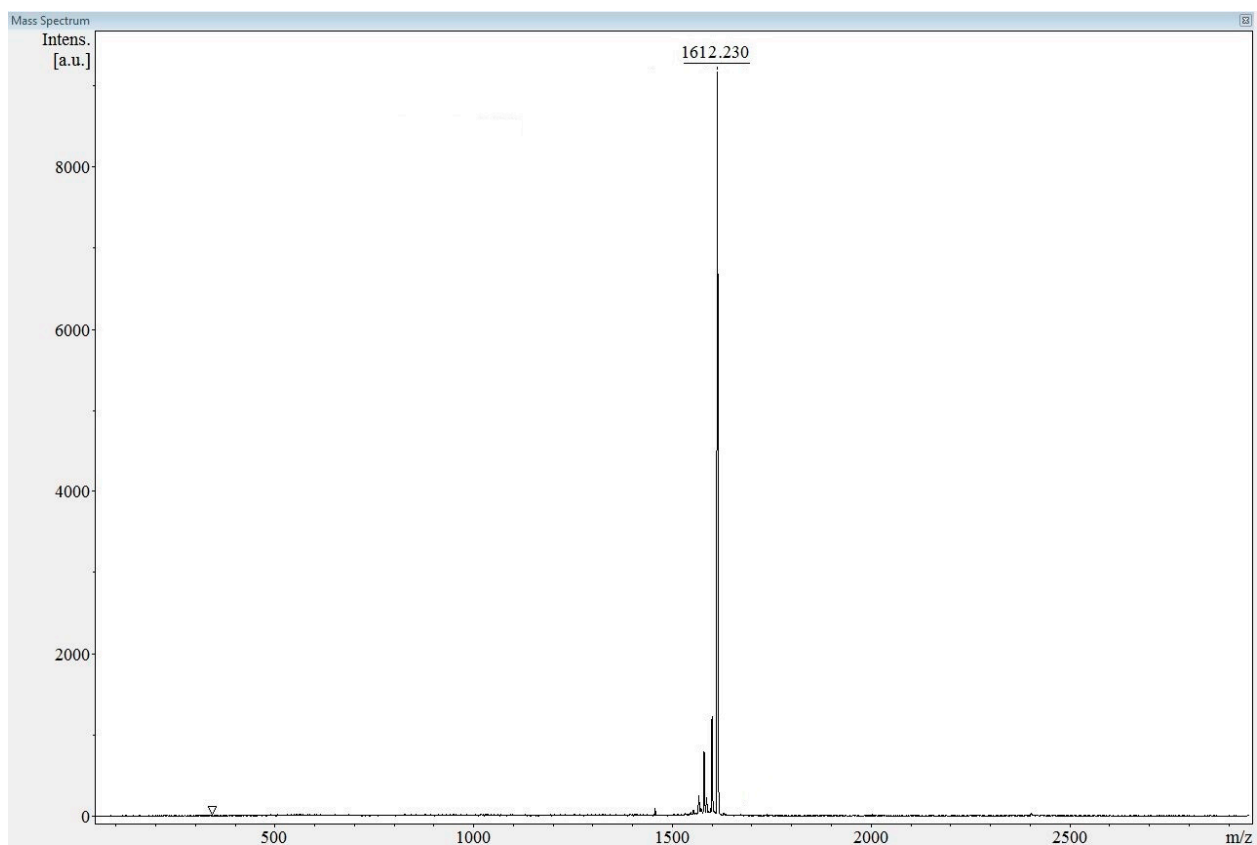

**Figure S8.** MALDI-TOF mass spectrum of Oleyl-R<sub>1</sub>-(HR)<sub>4</sub>.

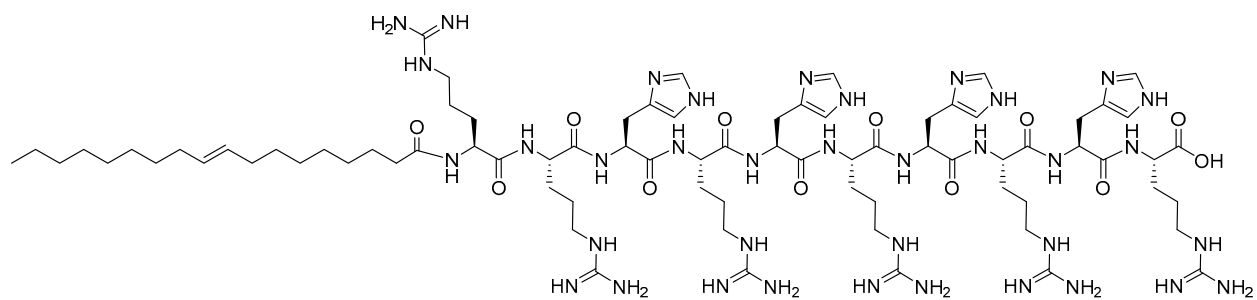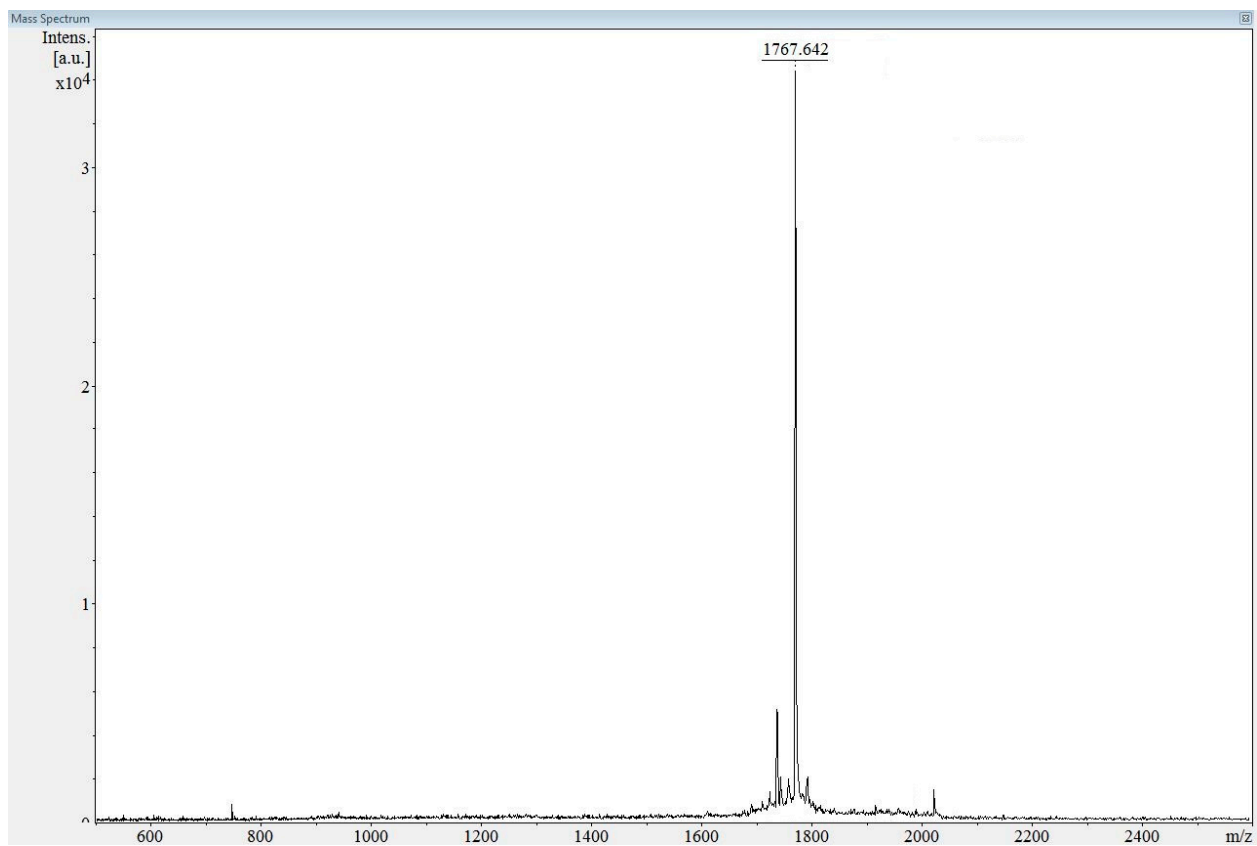

**Figure S9.** MALDI-TOF mass spectrum of Oleyl-R<sub>2</sub>-(HR)<sub>4</sub>.



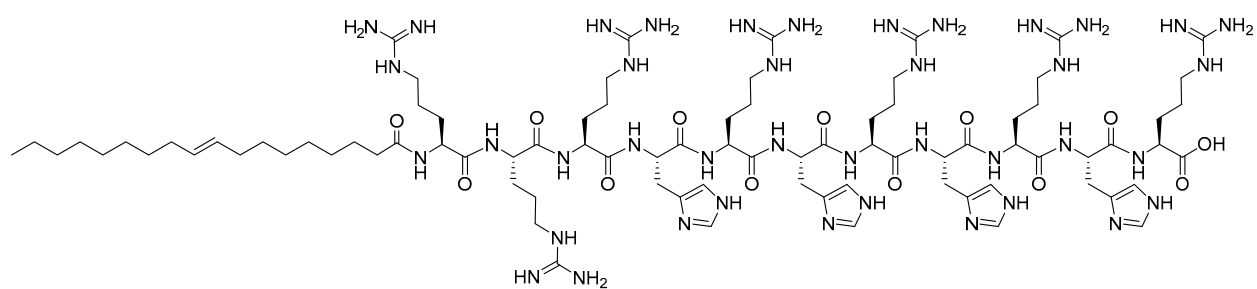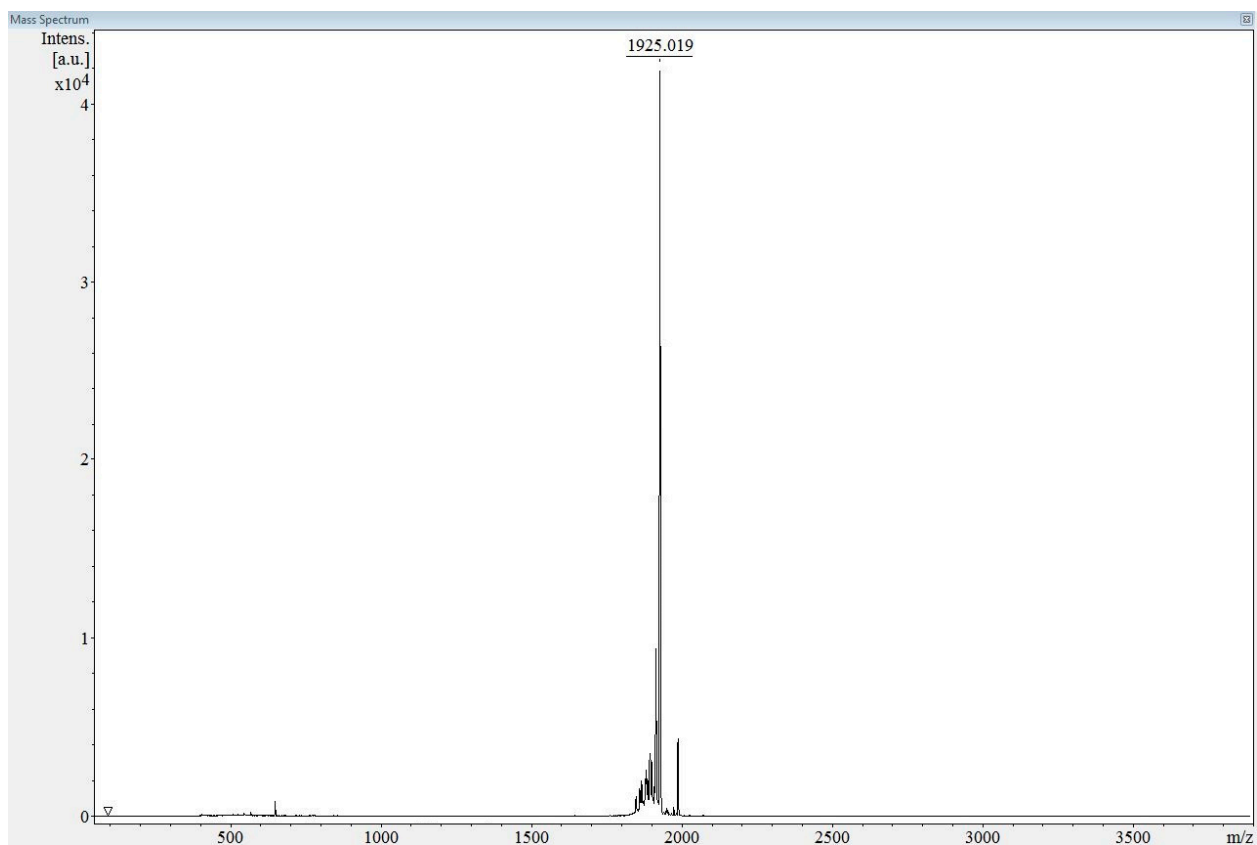

**Figure S10.** MALDI-TOF mass spectrum of Oleyl-R<sub>3</sub>-(HR)<sub>4</sub>.

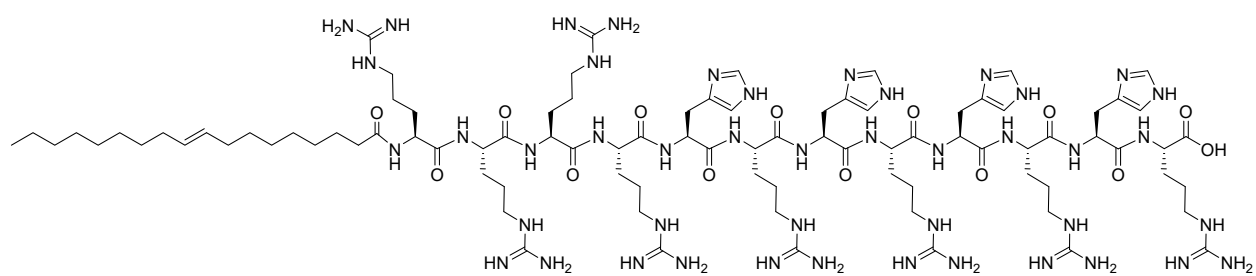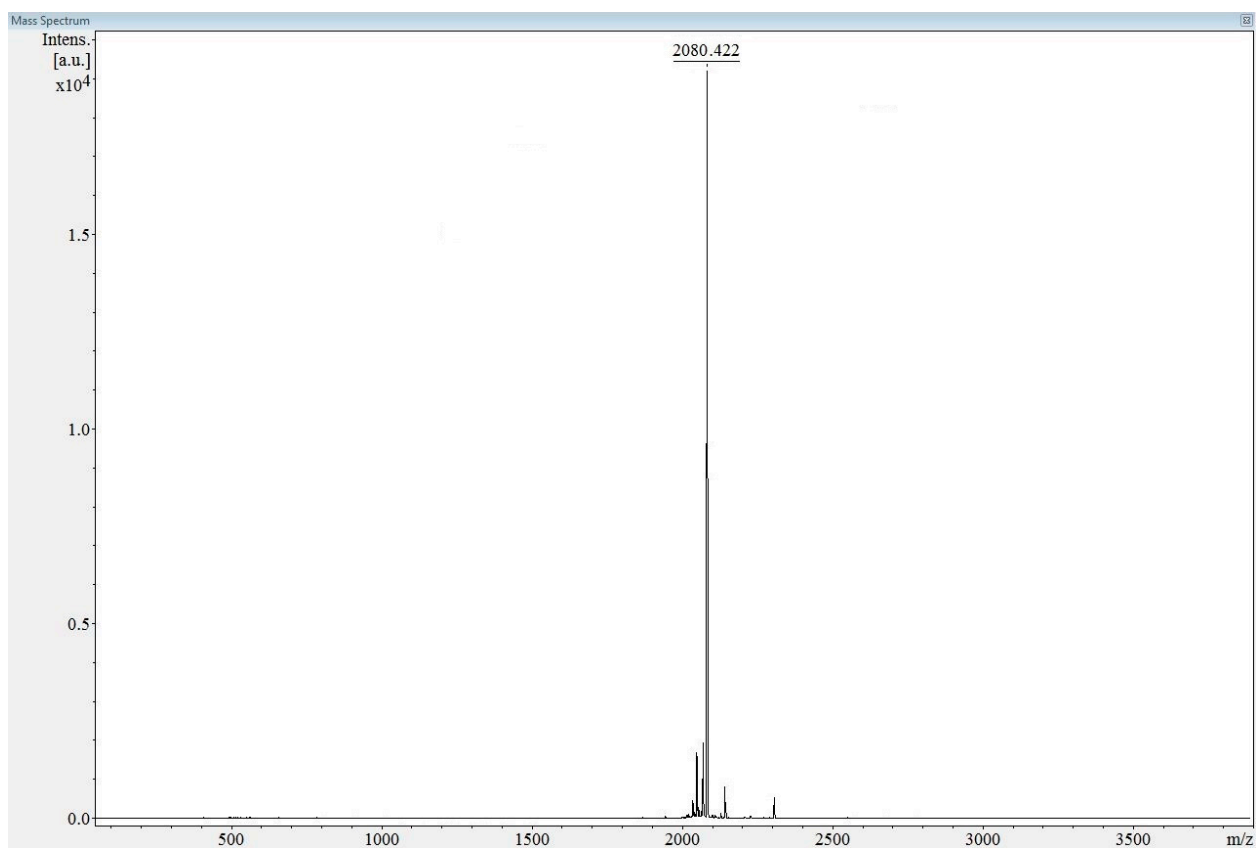

**Figure S11.** MALDI-TOF mass spectrum of Oleyl-R<sub>4</sub>-(HR)<sub>4</sub>.

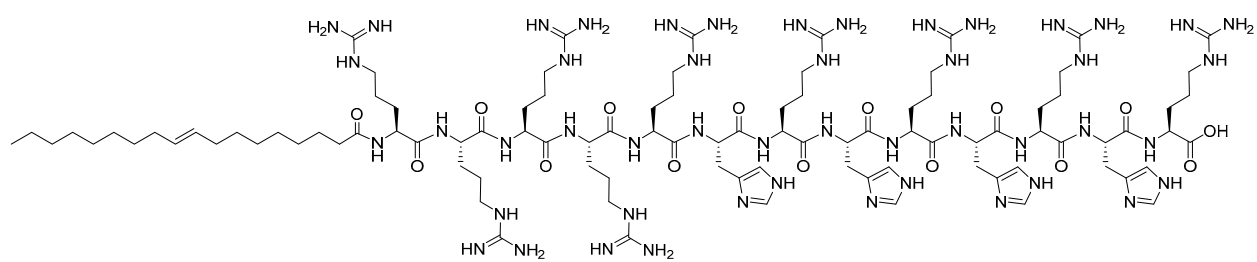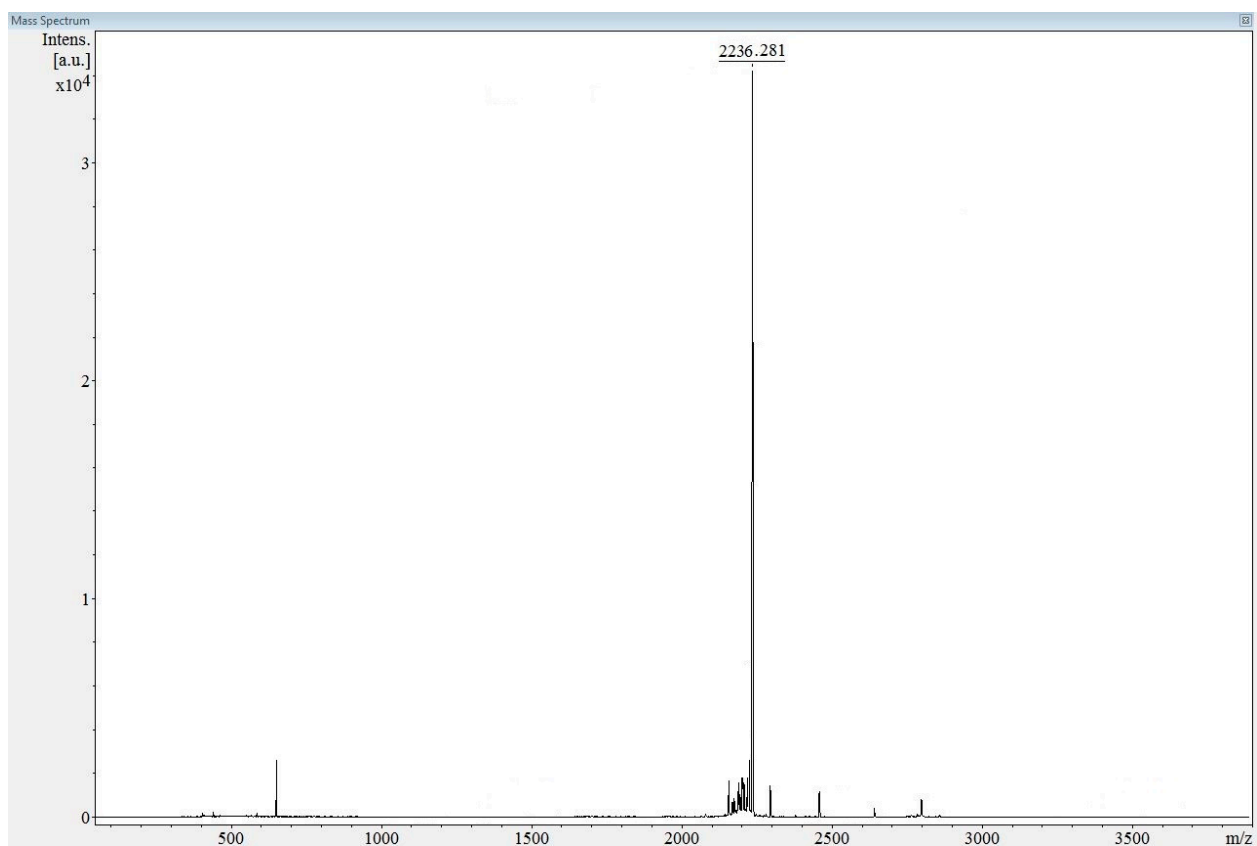

**Figure S12.** MALDI-TOF mass spectrum of Oleyl-R<sub>5</sub>-(HR)<sub>4</sub>.
